# Supplementary material for: Highly stratified mid-Pliocene Southern Ocean in PlioMIP2
Source: Copernicus journal article supplement (doi:10.5194/cp-20-1067-2024), 2024-05-02
Supplement: Supplementary file 1 [file cp-20-1067-2024-supplement.pdf]

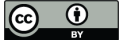

*Supplement of*

## **Highly stratified mid-Pliocene Southern Ocean in PlioMIP2**

**Julia E. Weiffenbach et al.**

*Correspondence to:* Julia E. Weiffenbach ([j.e.weiffenbach@uu.nl](mailto:j.e.weiffenbach@uu.nl))

The copyright of individual parts of the supplement might differ from the article licence.

## Supplementary Tables and Figures

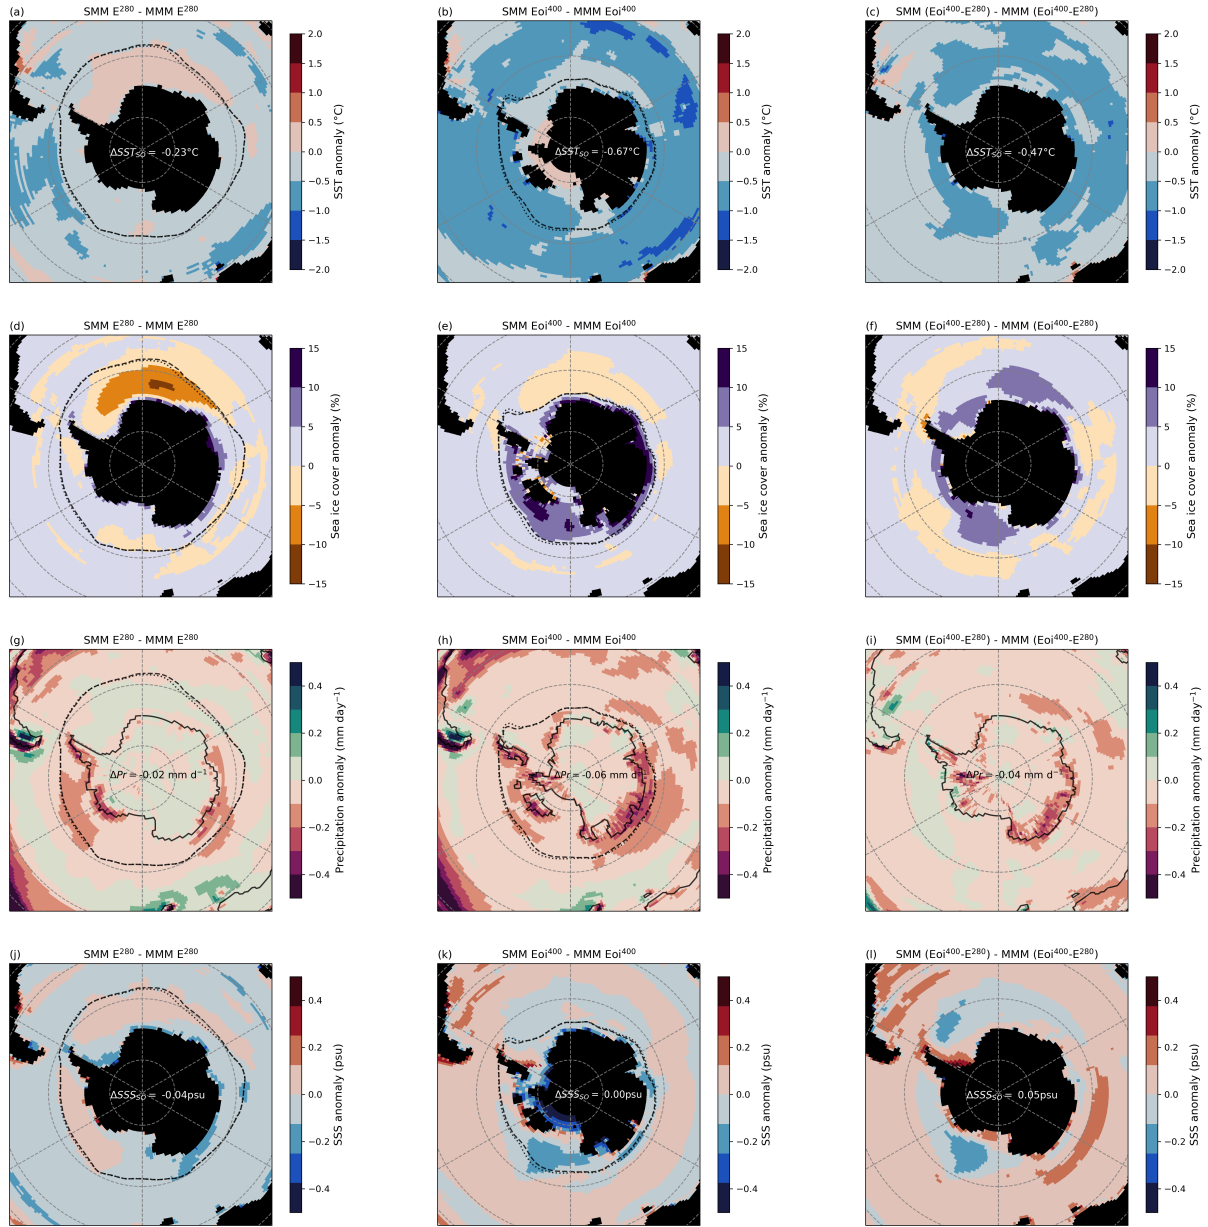

**Figure S1.** (a)-(c) SMM-MMM sea surface temperature (SST) anomalies for E<sup>280</sup>, Eoi<sup>400</sup> and Eoi<sup>400</sup>-E<sup>280</sup>, respectively. Dotted and dashed lines show the SMM and MMM sea-ice edge (15% sea-ice cover). The Southern-Ocean-average SST anomaly is printed. (d)-(f) SMM-MMM sea-ice cover anomalies for E<sup>280</sup>, Eoi<sup>400</sup> and Eoi<sup>400</sup>-E<sup>280</sup>, respectively. (g)-(i) Same as (a)-(c) for precipitation. The percentage change printed in (g), (h) and (i) is with respect to the MMM E<sup>280</sup>, MMM Eoi<sup>400</sup> and MMM Eoi<sup>400</sup>-E<sup>280</sup> precipitation, respectively. (j)-(l) Same as (a)-(c) for sea surface salinity (SSS).

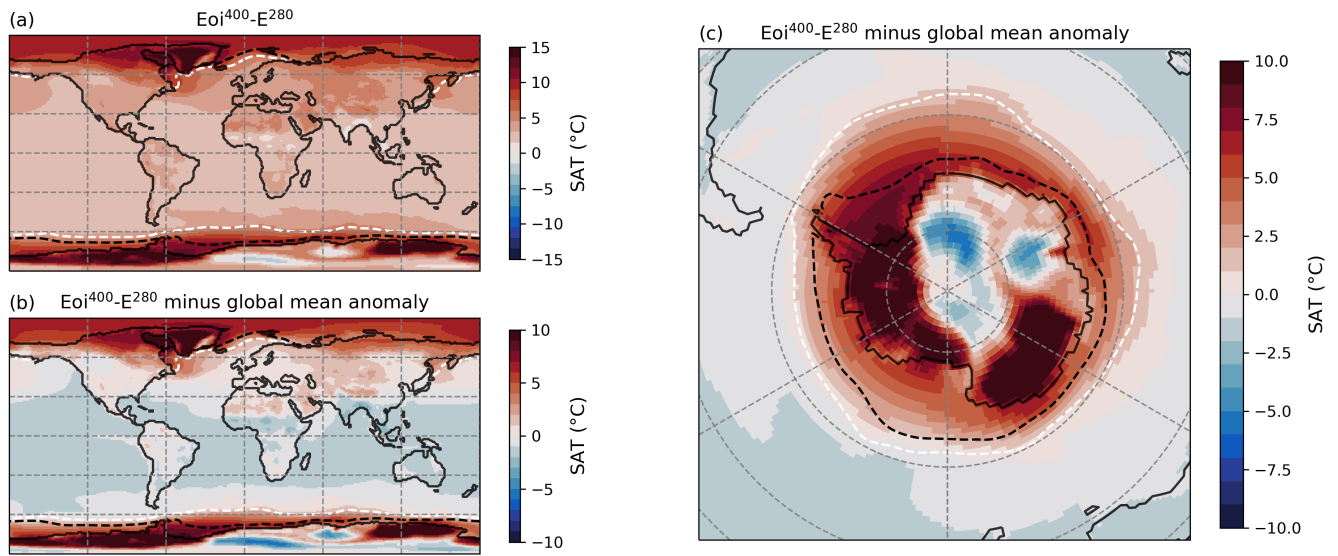

**Figure S2.** (a) MMM Eoi<sup>400</sup>-E<sup>280</sup> surface air temperature (SAT) anomaly. (b) MMM Eoi<sup>400</sup>-E<sup>280</sup> SAT anomaly minus the MMM global mean SAT anomaly. (c) Same as (b) but on an orthographic projection centered in Antarctica. White and black dashed lines show the MMM sea-ice edge (15% sea-ice cover) in E<sup>280</sup> and Eoi<sup>400</sup>, respectively.

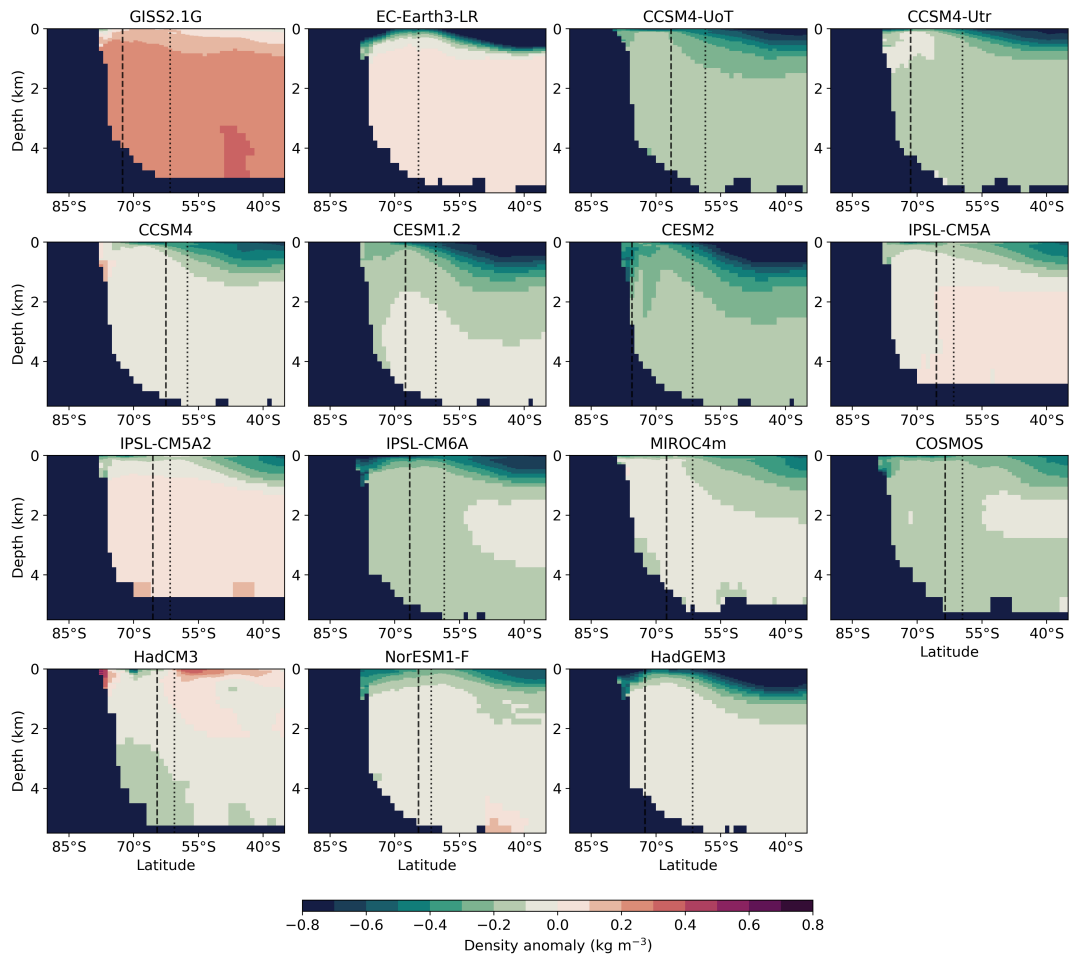

**Figure S3.** Individual model  $E_{oi}^{400}-E^{280}$  potential density anomalies. Vertical dotted and dashed lines indicate the MMM zonal mean sea-ice edge (15% sea-ice cover) in  $E^{280}$  and  $E_{oi}^{400}$ , respectively.

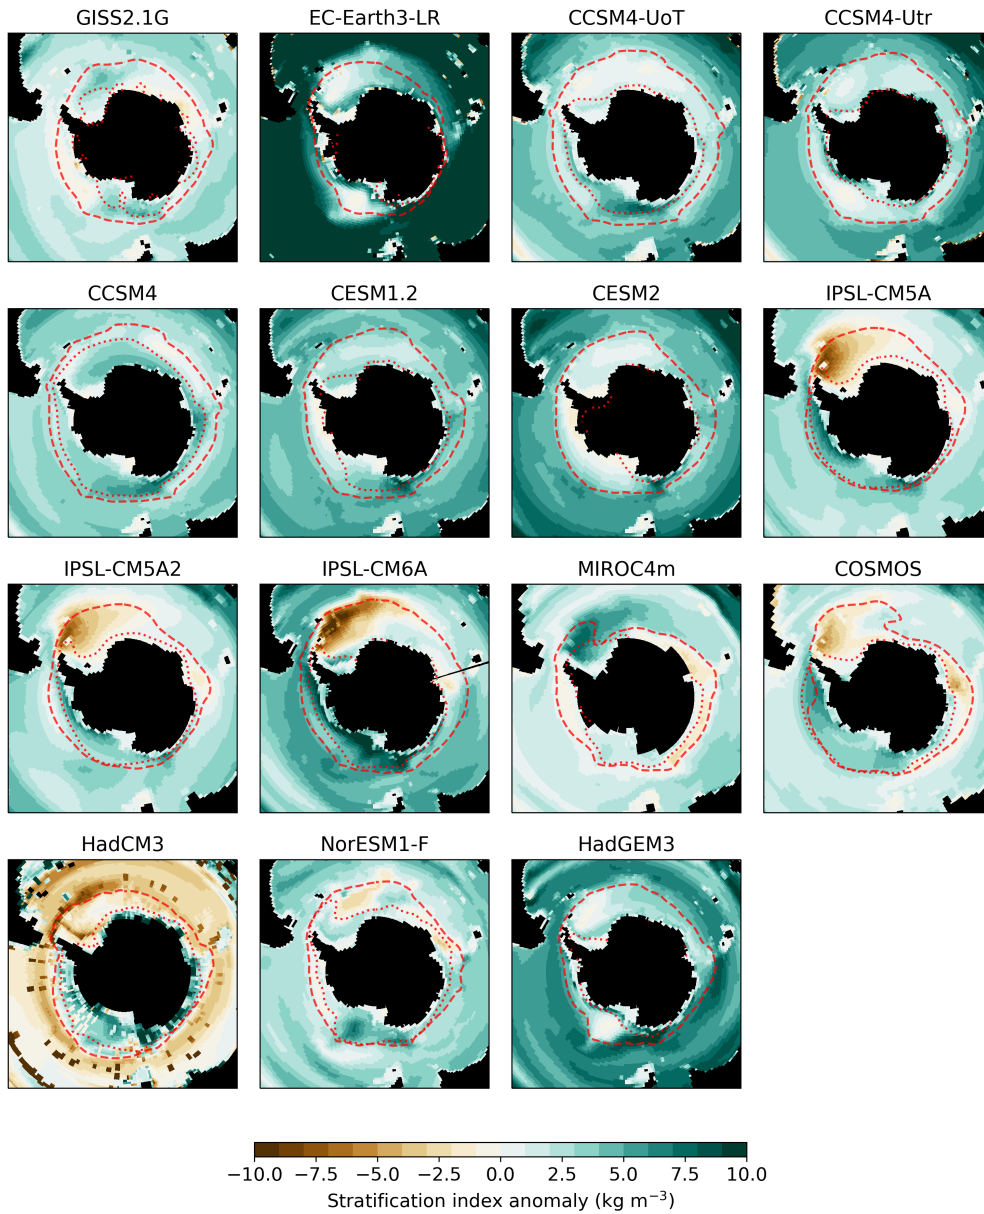

**Figure S4.** Individual model  $E_{oi}^{400} - E^{280}$  stratification index anomalies. Red dashed and dotted lines show the MMM sea-ice edge (15% sea-ice cover) in  $E^{280}$  and  $E_{oi}^{400}$ , respectively. The stratification index is calculated for each grid cell according to Equation 1.

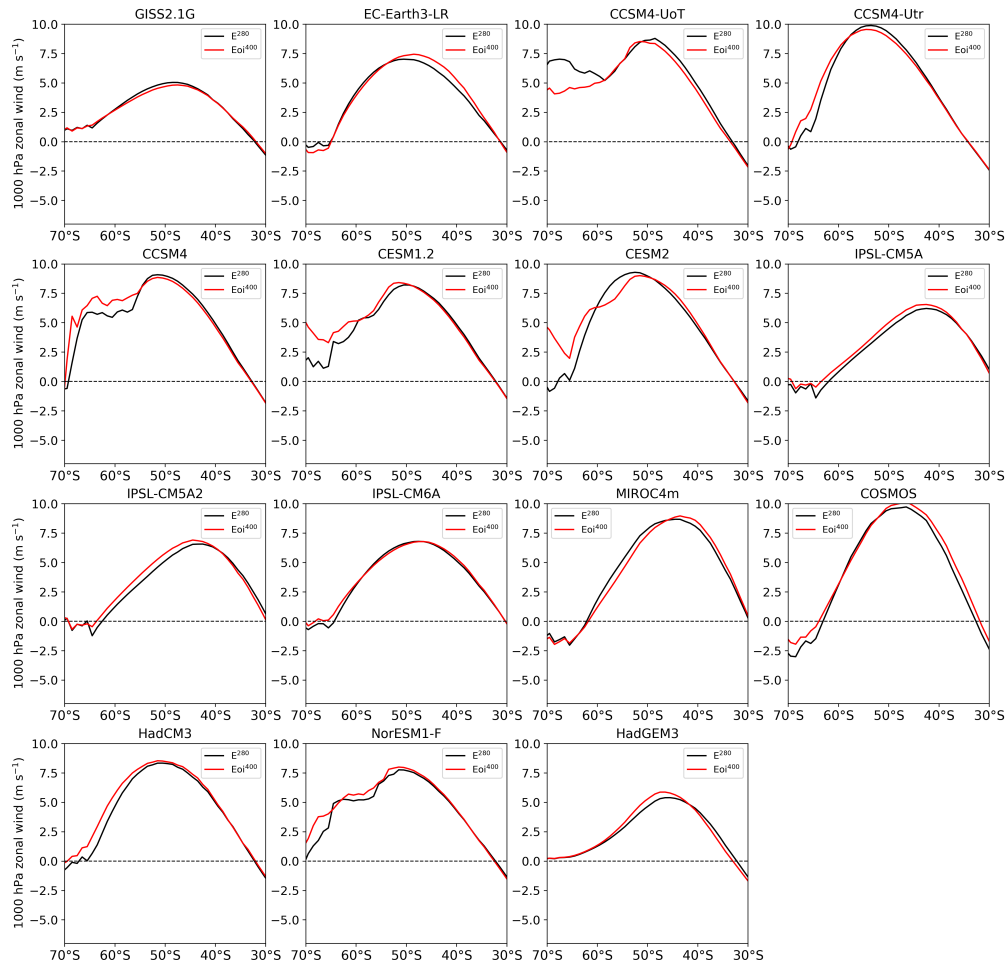

**Figure S5.** Individual model  $E_{01}^{400}$  and  $E^{280}$  zonal-mean 1000 hPa zonal wind.

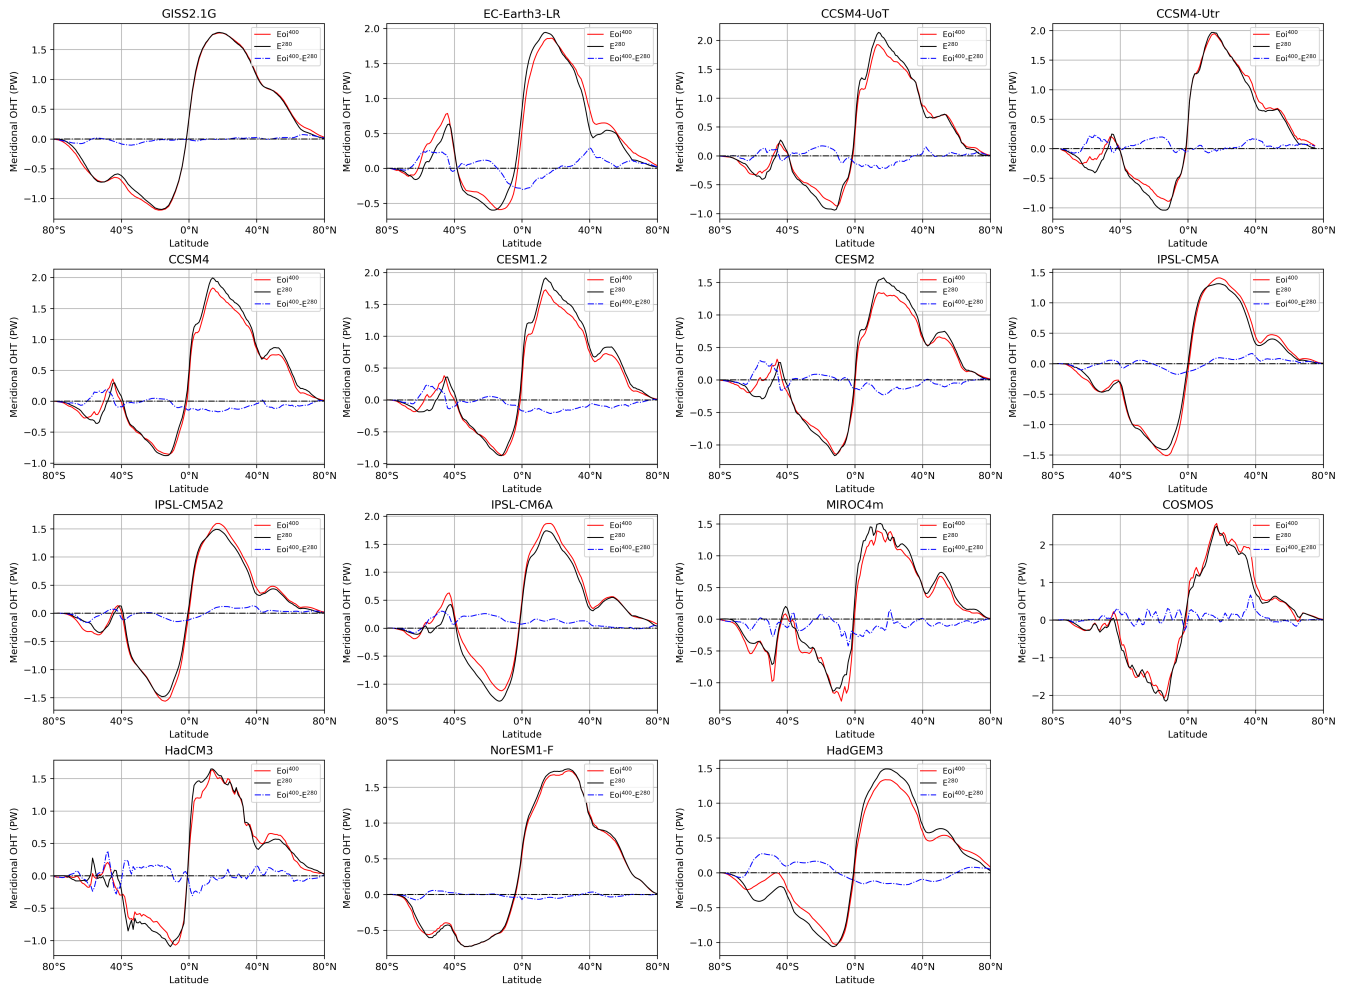

**Figure S6.** Individual model meridional ocean heat transport for  $E^{280}$ ,  $E_{oi}^{400}$  and  $E_{oi}^{400} - E^{280}$ .



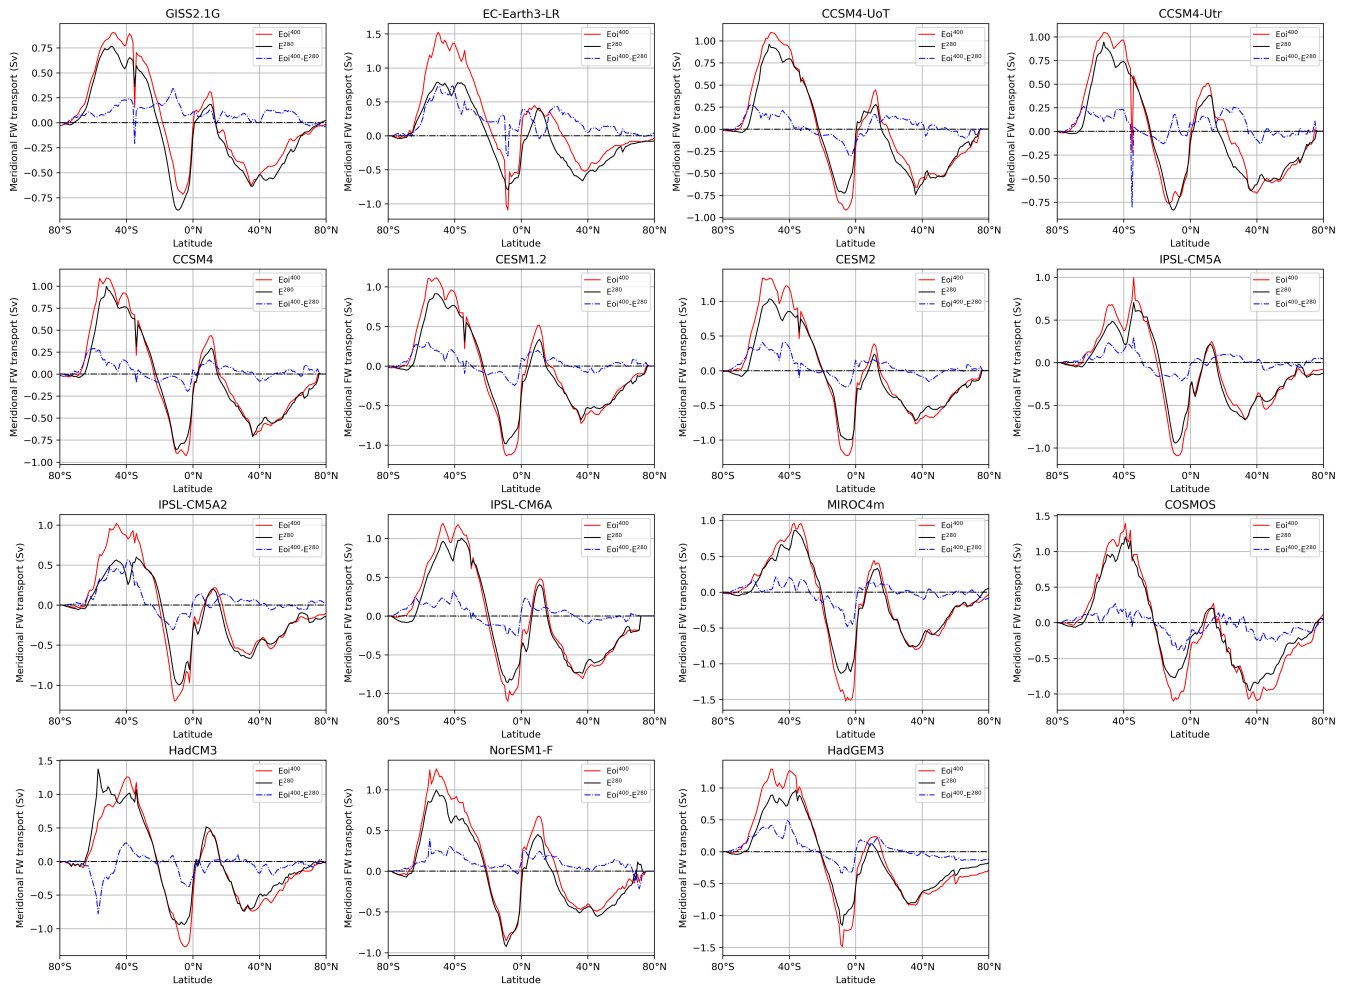

**Figure S7.** Individual model meridional freshwater transport for  $E^{280}$ ,  $E_{oi}^{400}$  and  $E_{oi}^{400}-E^{280}$ .

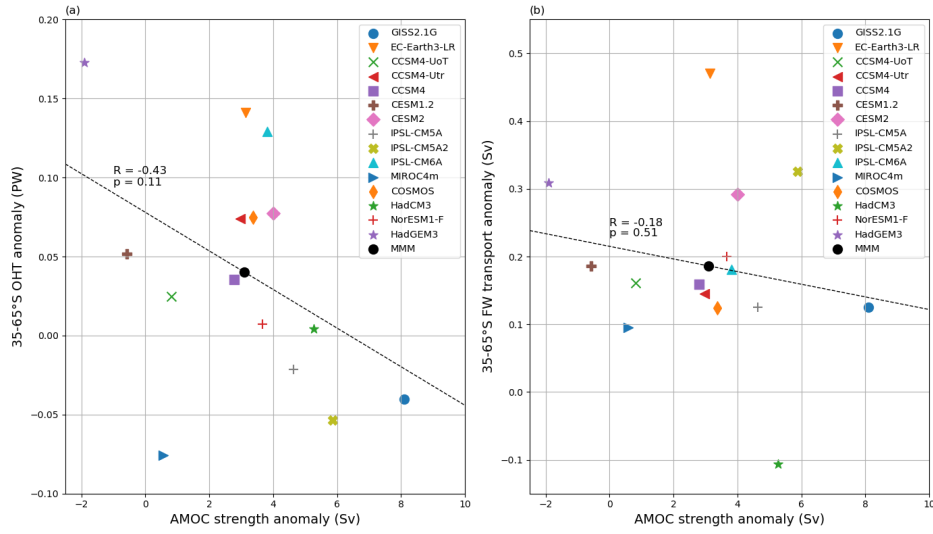

**Figure S8.** (a) Scatter plot of the individual model  $E_{oi}^{400}-E^{280}$  AMOC cell strength anomaly against the 35-65°S-average global ocean heat transport (OHT) anomaly. (b) Scatter plot of the individual model  $E_{oi}^{400}-E^{280}$  AMOC cell strength anomaly against the 35-65°S-average global freshwater transport (FWT) anomaly. Dashed lines show a linear least-squares fit to the individual model data, with indicated correlation  $R$ - and  $p$ -values.

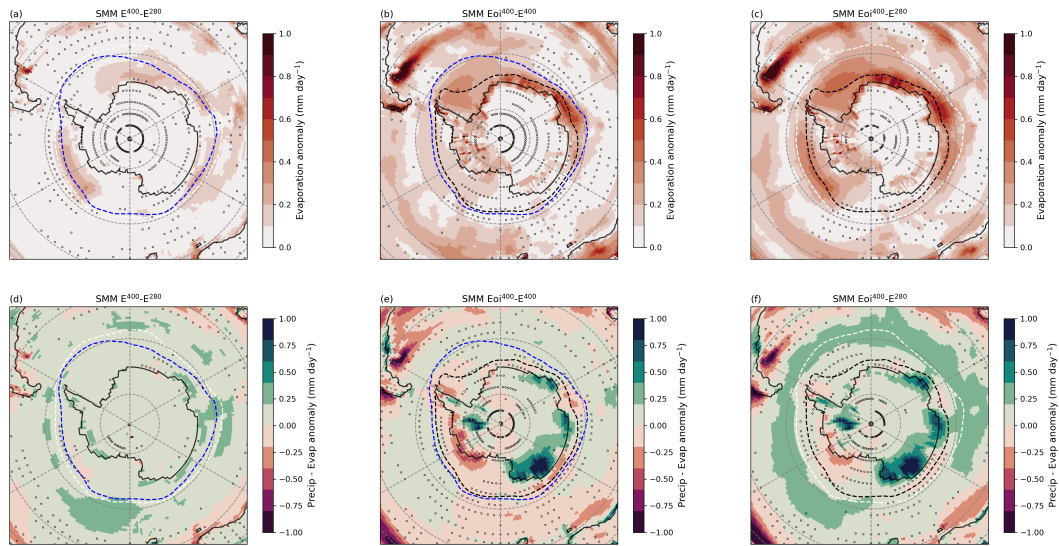

**Figure S9.** (a) SMM  $E^{400}-E^{280}$  precipitation minus evaporation (PmE) anomaly. (b),(c) Same as (a) for  $Eoi^{400}-E^{400}$  and  $Eoi^{400}-E^{280}$ . White, blue and black dashed lines show the SMM sea-ice edge (15% sea-ice cover) in  $E^{280}$ ,  $E^{400}$  and  $Eoi^{400}$ , respectively. Stippling indicates that less than 5 out of 7 (<70%) of the models included in the SMM agree on the sign of change.

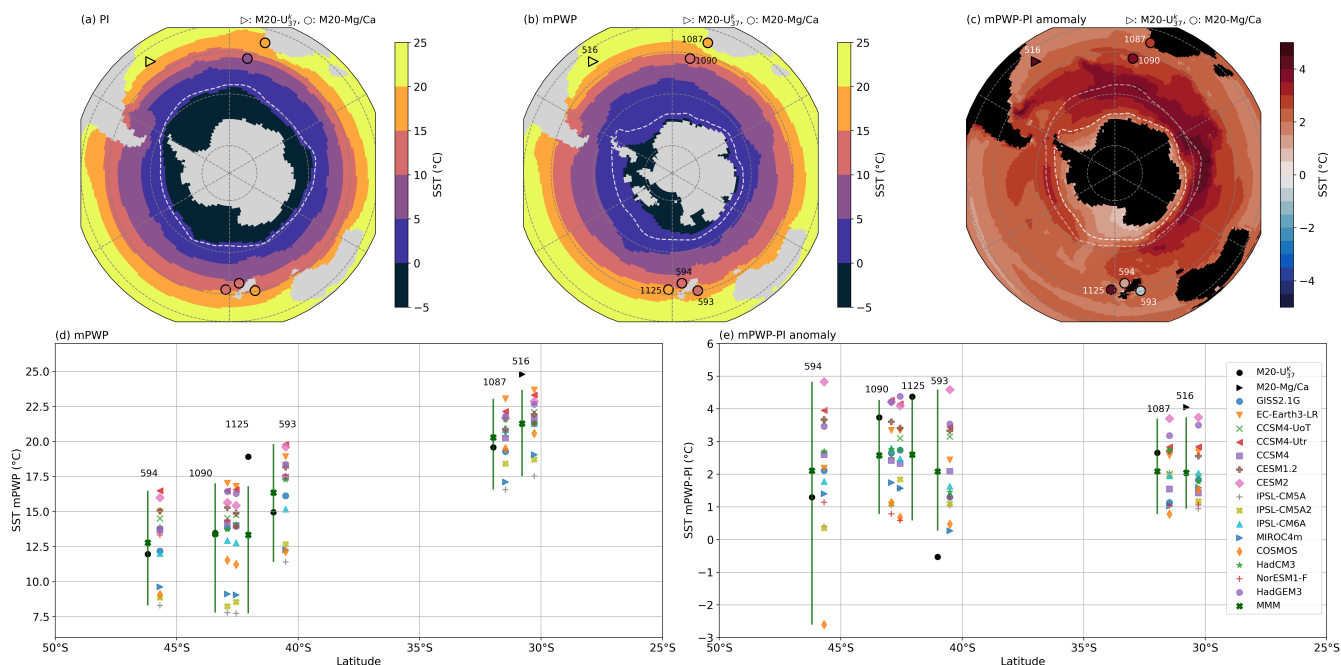

**Figure S10.** (a) Southern Ocean MMM  $E^{280}$  SST and pre-industrial ERSSTv5 SSTs (Huang et al., 2017) at proxy locations. (b) Southern Ocean MMM  $E_{oi}^{400}$  SST and KM5c mPWP SSTs reconstructed by McClymont et al. (2020) (M20) at proxy locations. M20- $U_{37}^k$  and M20-Mg/Ca refer to the McClymont et al. (2020) SST reconstructions using  $U_{37}^k$  and Mg/Ca proxies, respectively. (c) Southern Ocean MMM  $E_{oi}^{400}-E^{280}$  SST anomalies and KM5c mPWP SSTs (McClymont et al., 2020) minus pre-industrial ERSSTv5 SSTs (Huang et al., 2017) at proxy locations. (d) Individual model mPWP ( $E_{oi}^{400}$ ) SSTs and reconstructed mPWP SSTs (black) at proxy locations in or near the Southern Ocean. A vertical dark green line shows the model spread and the MMM is indicated by a dark green cross. (e) Individual model SST anomalies ( $E_{oi}^{400}-E^{280}$ ) and reconstructed mPWP-Pi SST anomalies (black) at proxy locations in or near the Southern Ocean. A vertical dark green line shows the model spread and the MMM is indicated by a dark green cross. Pre-industrial SSTs are computed with the pre-industrial ERSST5 1870-1900 data (Huang et al., 2017).

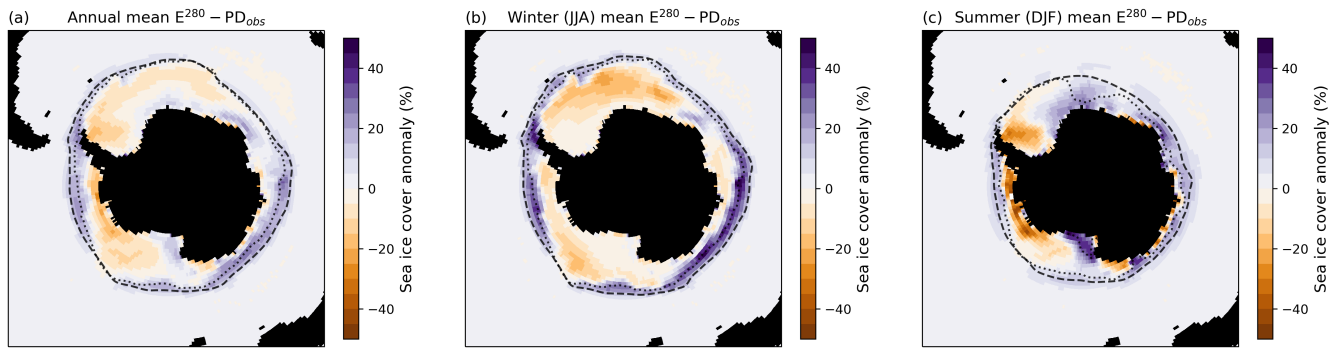

**Figure S11.** (a) Annual-mean MMM  $E^{280}$  – observed present-day (PD<sub>obs</sub>, 1979-1999) sea-ice cover anomaly. (b) Winter-mean (JJA) MMM  $E^{280}$  – observed present-day (PD<sub>obs</sub>, 1979-1999) sea-ice cover anomaly. (c) Summer-mean (DJF) MMM  $E^{280}$  – observed PD (1979-1999) sea-ice cover anomaly. Black dashed lines show the MMM  $E^{280}$  sea-ice edge (15% sea-ice cover) and black dotted lines show the PD<sub>obs</sub> sea-ice edge.

**Table S1.** Individual model, MMM and SMM stratification index averaged over the high-latitude Southern Ocean (60–90°S).

| Model        | Average stratification index 60–90°S ( $\text{kg m}^{-3}$ ) |           |                |                          |                     |
|--------------|-------------------------------------------------------------|-----------|----------------|--------------------------|---------------------|
|              | $E^{280}$                                                   | $E^{400}$ | $E_{oi}^{400}$ | $E_{oi}^{400} - E^{280}$ | $E^{400} - E^{280}$ |
| GISS-E2.1G   | 4.7                                                         |           | 5.4            | 0.7                      |                     |
| EC-Earth3-LR | 5.6                                                         |           | 10.2           | 4.6                      |                     |
| CCSM4-UoT    | 4.7                                                         | 5.9       | 6.2            | 1.5                      | 1.2                 |
| CCSM4-Utr    | 5.1                                                         |           | 6.8            | 1.7                      |                     |
| CCSM4        | 5.1                                                         |           | 7.2            | 2.1                      |                     |
| CESM1.2      | 7.0                                                         |           | 8.9            | 1.9                      |                     |
| CESM2        | 7.9                                                         | 8.9       | 9.4            | 1.5                      | 1.0                 |
| IPSL-CM5A    | 3.3                                                         |           | 4.9            | 1.6                      |                     |
| IPSL-CM5A2   | 3.8                                                         | 4.1       | 5.1            | 1.3                      | 0.3                 |
| IPSL-CM6A    | 5.9                                                         |           | 9.0            | 3.1                      |                     |
| MIROC4m      | 3.7                                                         | 3.7       | 4.5            | 0.8                      | 0.0                 |
| COSMOS       | 3.5                                                         | 4.4       | 5.2            | 1.7                      | 0.9                 |
| HadCM3       | 6.7                                                         | 7.5       | 7.1            | 0.4                      | 0.8                 |
| NorESM1-F    | 5.1                                                         | 5.9       | 6.8            | 1.7                      | 0.8                 |
| HadGEM3      | 4.7                                                         |           | 8.5            | 3.8                      |                     |
| MMM          | 5.1                                                         |           | 7.0            | 1.9                      |                     |
| SMM          | 5.1                                                         | 5.8       | 6.3            | 1.2                      | 0.7                 |
